# Supplementary material for: Sex difference: an important issue to consider in epidemiological and clinical studies dealing with serum paraoxonase-1
Source: PubMed Central journal article supplement (PMC6529704; doi:10.3164/jcbn.18-73), 2019-01-30
Supplement: jcbn18-73sf01.pdf [file jcbn18-73sf01.pdf]

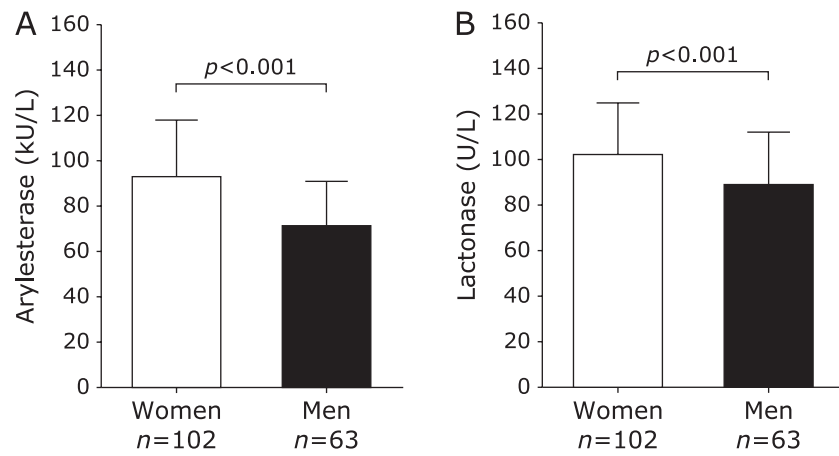

**Supplemental Fig. 1.** Arylesterase (A) and lactonase (B) activities measured in a subsample of women and men with a similar concentration of HDL cholesterol (below 50 mg/dl). Within this subset, both PON1 activities were higher in women than in men ( $p < 0.001$ ). The bars represent the mean  $\pm$  SE.
