# Supplementary material for: Sex difference: an important issue to consider in epidemiological and clinical studies dealing with serum paraoxonase-1
Source: PubMed Central journal article supplement (PMC6529704; doi:10.3164/jcbn.18-73), 2019-01-30
Supplement: jcbn18-73sf02.pdf [file jcbn18-73sf02.pdf]

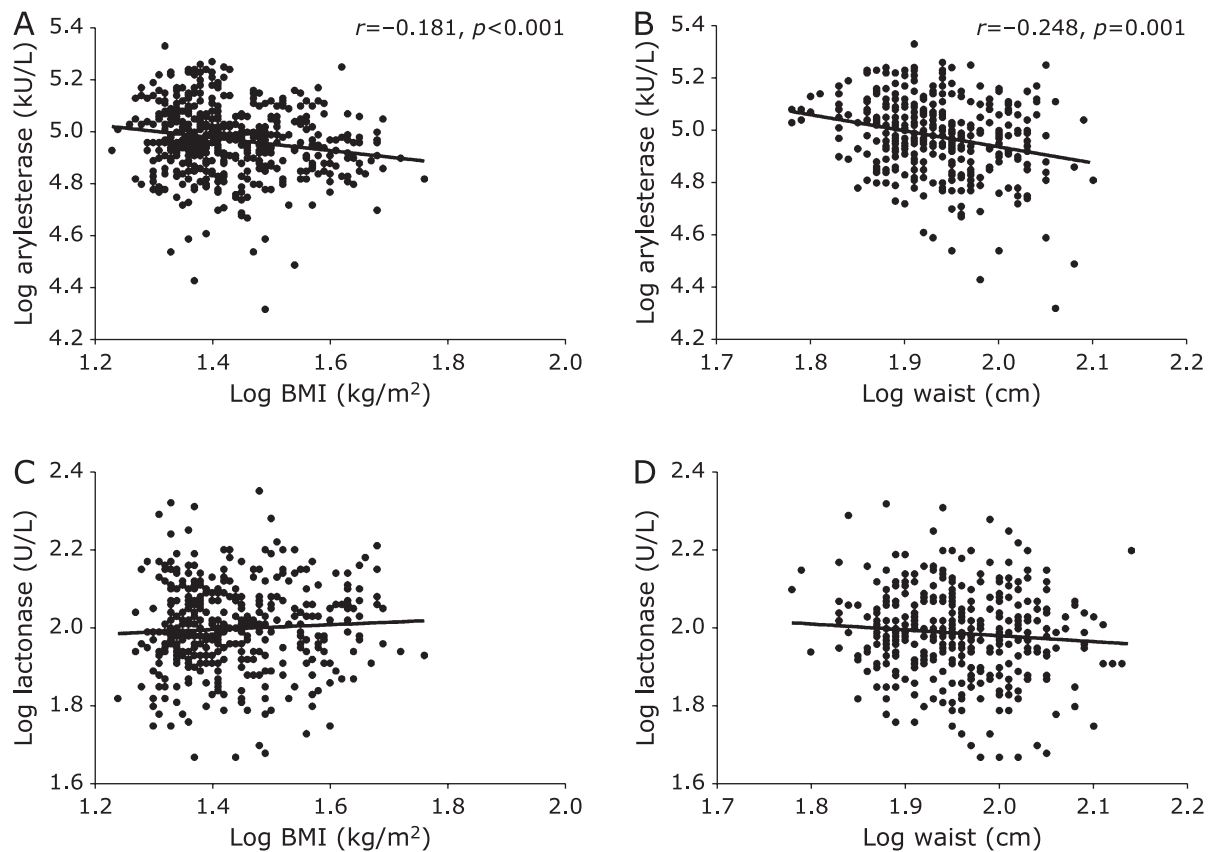

**Supplemental Fig. 2.** Correlation of arylesterase and lactonase activities with body mass index (BMI) and waist circumference in the whole population. Arylesterase was significantly and negatively correlated with BMI (A,  $r = -0.181$ ,  $p < 0.001$ ) and waist circumference (B,  $r = -0.248$ ,  $p < 0.001$ ) in the whole population. On the contrary, lactonase was not related with BMI (C) and showed only a very weak negative association with waist circumference (D,  $r = -0.123$ ,  $p = 0.04$ ). All the values are expressed as  $\text{Log}_{10}$ .
