# Supplementary material for: Sex difference: an important issue to consider in epidemiological and clinical studies dealing with serum paraoxonase-1
Source: PubMed Central journal article supplement (PMC6529704; doi:10.3164/jcbn.18-73), 2019-01-30
Supplement: jcbn18-73sf05.pdf [file jcbn18-73sf05.pdf]

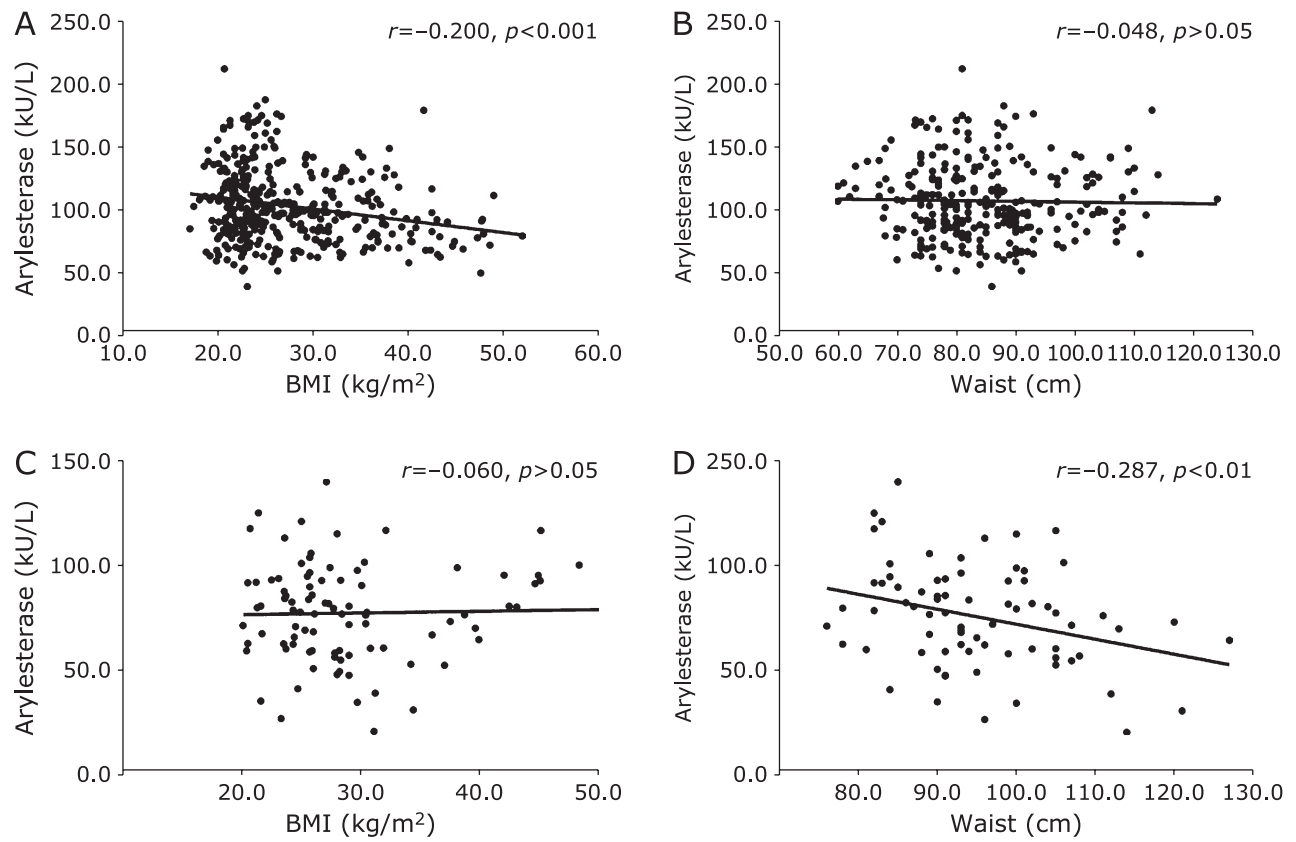

**Supplemental Fig. 5.** Correlation of arylesterase activity with body mass index (BMI) and waist circumference for women (A, B) and men (C, D). Arylesterase activity was negatively correlated with BMI in women ( $r = -0.200, p < 0.001$ ) (A), but not in men (C). The activity was inversely associated with waist circumference in men ( $r = -0.287, p < 0.01$ ) (D), but not in women (B). These scatter plots display the same data of Fig. 2 before logarithmic transformation.
