# Supplementary material for: Sex difference: an important issue to consider in epidemiological and clinical studies dealing with serum paraoxonase-1
Source: PubMed Central journal article supplement (PMC6529704; doi:10.3164/jcbn.18-73), 2019-01-30
Supplement: jcbn18-73st01.pdf [file jcbn18-73st01.pdf]

**Supplemental Table 1.** Serum Arylesterase/Lactonase activities of PON1 in women and men

|                     | Women (n = 374) | Men (n = 92) | <i>p</i> |
|---------------------|-----------------|--------------|----------|
| PON1 activities     |                 |              |          |
| Arylesterase (kU/L) | 103 ± 29        | 77 ± 22      | <0.001   |
| Lactonase (U/L)     | 106 ± 27        | 92 ± 22      | <0.001   |

Data presented are expressed as mean ± SD.
