# Supplementary material for: Sex difference: an important issue to consider in epidemiological and clinical studies dealing with serum paraoxonase-1
Source: PubMed Central journal article supplement (PMC6529704; doi:10.3164/jcbn.18-73), 2019-01-30
Supplement: jcbn18-73st02.pdf [file jcbn18-73st02.pdf]

**Supplemental Table 2.** Serum Arylesterase/Lactonase activities of PON1 in women and men aged <45 or >55 years

|                     | Age <45 years  |                      |                          | Age >55 years  |                      |                          |
|---------------------|----------------|----------------------|--------------------------|----------------|----------------------|--------------------------|
|                     | Women (n = 88) | Men (n = 31)         | Difference men/women (%) | Women (n = 88) | Men (n = 31)         | Difference men/women (%) |
| PON1 Activities     |                |                      |                          |                |                      |                          |
| Arylesterase (kU/L) | 101 ± 28       | 83 ± 16 <sup>a</sup> | 18                       | 104 ± 29       | 72 ± 21 <sup>a</sup> | 31                       |
| Lactonase (U/L)     | 105 ± 26       | 97 ± 23              | 8                        | 106 ± 26       | 86 ± 22 <sup>a</sup> | 19                       |

Data presented are expressed as mean ± SD. <sup>a</sup>p<0.001 vs Women.
