# Supplementary material for: Sex difference: an important issue to consider in epidemiological and clinical studies dealing with serum paraoxonase-1
Source: PubMed Central journal article supplement (PMC6529704; doi:10.3164/jcbn.18-73), 2019-01-30
Supplement: jcbn18-73st03.pdf [file jcbn18-73st03.pdf]

**Supplemental Table 3.** Stepwise multiple regression analysis of the contribution of BMI or waist circumference on arylesterase variance ( $n = 466$ )

| Regression models*      | Parameter estimate (SE) | Standardized coefficient | $p$    | Overall model $R^2$ ( $p$ value) |
|-------------------------|-------------------------|--------------------------|--------|----------------------------------|
| 1                       |                         |                          |        |                                  |
| Log <sub>10</sub> BMI   | -0.242 (0.061)          | -0.181                   | >0.001 | 3.3 (<0.001)                     |
| 2                       |                         |                          |        |                                  |
| Gender                  | -0.107 (0.015)          | -0.312                   | >0.001 |                                  |
| HDL-c                   | -0.002 (0.000)          | -0.221                   | >0.001 |                                  |
| Log <sub>10</sub> BMI   | -0.126 (0.056)          | -0.095                   | >0.05  | 21.6 (<0.001)                    |
| 3                       |                         |                          |        |                                  |
| Log <sub>10</sub> waist | -0.616 (0.128)          | -0.248                   | >0.001 | 6.1 (<0.001)                     |
| 4                       |                         |                          |        |                                  |
| Gender                  | -0.131 (0.018)          | -0.382                   | >0.001 |                                  |
| HDL-c                   | -0.002 (0.000)          | -0.222                   | >0.001 | 25.7 (<0.001)                    |

Regression models 1 and 3 are univariate models with Log<sub>10</sub> BMI (1) or Log<sub>10</sub> waist (3) as explanatory variables. Multiple regression models 2 and 4 included the following covariates: age, gender, smoking and Log<sub>10</sub> BMI (2) or Log<sub>10</sub> waist (4). Criteria for variable inclusion in the stepwise regression analysis were entry if  $p \leq 0.05$  and exclusion if  $p > 0.10$ . BMI, Body Mass Index; HDL-c, high density lipoprotein cholesterol.
